## **Elamipretide (SS-31) Treatment Attenuates Age-Associated Post-Translational Modifications of Heart Proteins**

Jeremy A. Whitson<sup>1</sup>, Miguel Martín-Pérez<sup>2</sup>, Tong Zhang<sup>3</sup>, Matthew J. Gaffrey<sup>3</sup>, Gennifer E. Merrihew<sup>2</sup>, Eric Huang<sup>2</sup>, Collin C. White<sup>4</sup>, Terrance J. Kavanagh<sup>4</sup>, Wei-Jun Qian<sup>3</sup>, Matthew D. Campbell<sup>5</sup>, Michael J. MacCoss<sup>2</sup>, David J. Marcinek<sup>5</sup>, Judit Villén<sup>2</sup>, Peter S. Rabinovitch<sup>6,\*</sup>

1. University of Washington, Department of Pathology, 1959 NE Pacific St, Seattle, WA 98195  
(Current affiliation: Davidson College, Department of Biology, 405 N Main St, Davidson, NC 28035)
2. University of Washington, Department of Genome Sciences, 3720 15th Street NE, Seattle WA 98195
3. Pacific Northwest National Laboratory, Integrative Omics, 902 Battelle Boulevard, Richland, WA 99352
4. University of Washington, Department of Environmental & Occupational Health Sciences, 4225 Roosevelt Way NE, Seattle, WA 98105
5. University of Washington, Department of Radiology, 1959 NE Pacific St, Seattle, WA 98195
6. University of Washington, Department of Pathology, 1959 NE Pacific St, Seattle, WA 98195

**\* Corresponding Author:**

Phone: 206-685-3761; Fax: 206-616-8271

Email: [petersr@u.washington.edu](mailto:petersr@u.washington.edu)

1 **ABSTRACT**

2 It has been demonstrated that elamipretide (SS-31) rescues age-related functional deficits in the  
3 heart but the full set of mechanisms behind this have yet to be determined. We investigated the  
4 hypothesis that elamipretide influences post-translational modifications to heart proteins. The S-  
5 glutathionylation and phosphorylation proteomes of mouse hearts were analyzed using shotgun  
6 proteomics to assess the effects of aging on these post-translational modifications and the ability of the  
7 mitochondria-targeted drug elamipretide to reverse age-related changes. Aging led to an increase in  
8 oxidation of protein thiols demonstrated by increased S-glutathionylation of cysteine residues on proteins  
9 from Old (24 months old at the start of the study) mouse hearts compared to Young (5-6 months old).  
10 This shift in the oxidation state of the proteome was almost completely reversed by 8-weeks of treatment  
11 with elamipretide. Many of the significant changes that occurred were in proteins involved in  
12 mitochondrial or cardiac function. We also found changes in the mouse heart phosphoproteome that  
13 were associated with age, some of which were partially restored with elamipretide treatment. Parallel  
14 reaction monitoring of a subset of phosphorylation sites revealed that the unmodified peptide reporting  
15 for Myot S231 increased with age, but not its phosphorylated form and that both phosphorylated and  
16 unphosphorylated forms of the peptide covering cMyBP-C S307 increased, but that elamipretide  
17 treatment did not affect these changes. These results suggest that changes to thiol redox state and  
18 phosphorylation status are two ways in which age may affect mouse heart function, which can be restored  
19 by treatment with elamipretide.

20 **KEYWORDS:** Aging, mitochondria, heart, SS-31, elamipretide mass spectrometry, S-glutathionylation,  
21 phosphoproteomics, redox proteomics, post-translational modification

22

23 **INTRODUCTION**

24 Alteration of protein post-translational modifications (PTMs) is a well-established mechanism of  
25 cellular aging (Morimoto & Cuervo, 2014; Santos & Lindner, 2017; Walther et al., 2015). These alterations  
26 contribute to age-related dysfunction in many tissue and organ systems, including the heart which has  
27 been shown to have altered PTM profiles with age (Chiao et al., 2020). These age-associated changes  
28 could contribute to cardiac pathologies, the leading cause of death in elderly populations (Dai et al., 2012;  
29 Heron & Anderson, 2016).

30 Age-related changes to PTMs include both enhancement and loss of modifications to various  
31 residues. Greater oxidative stress in the cell, primarily due to elevated mitochondrial oxidant production,  
32 is a major source of PTMs that are elevated with age (Kuka et al., 2014; Santos & Lindner, 2017). Among

33 the most common oxidative modifications is reversible S-glutathionylation, including those due to the  
34 actions of glutathione-utilizing defense mechanisms that are required to prevent harmful forms of  
35 reactive oxygen species (ROS) from damaging proteins (Grek et al., 2013). S-glutathionylation can thus be  
36 viewed as a marker of general protein oxidation. We have demonstrated that mouse hearts show  
37 increased oxidative stress (Dai et al., 2012) and enhancement of S-glutathionylated residues with age  
38 (Chiao et al., 2020).

39 Aging also leads to dysregulation in the phosphorylation of various residues that play an important  
40 role in signaling and cellular regulation (Santos & Lindner, 2017). We have previously shown that changes  
41 in the phosphorylation of key residues in cardiac myosin binding protein C (cMyBP-C) and cardiac troponin  
42 I (cTnI) appear to be major contributors to the age-related loss of diastolic function in the mouse heart  
43 (Chiao et al., 2020).

44 Restoration of proper PTM profiles has been proposed as one way to repair function in old age.  
45 Since much of this dysregulation originates from altered mitochondrial energetics and ROS, drugs that  
46 improve mitochondrial health have a strong potential to restore PTM balance. Elamipretide (also referred  
47 to in this paper by its original designation of SS-31) is a mitochondrial-targeted drug that we have  
48 previously shown to be effective at restoring function in old mouse hearts (Whitson et al., 2020). One  
49 mechanism by which elamipretide achieves this effect is by modifying PTM profiles, including enhanced  
50 cMyBP-C phosphorylation and decreased global S-glutathionylation (Chiao et al., 2020). These changes  
51 are likely secondary to its primary effect of associating with the cardiolipin-rich mitochondrial inner  
52 membrane where it improves the efficiency of the electron transport chain and other mitochondrial  
53 proteins and reduces the leak of reactive species (Campbell et al., 2019; Chavez et al., 2019; Mitchell et  
54 al., 2020; Whitson et al., 2020; Zhang et al., 2020).

55 To better understand the effects of elamipretide on S-glutathionylation and phosphorylation of  
56 heart protein residues, both at the level of individual proteins and across biological pathways, we used a  
57 shotgun proteomics approach to compare phosphoproteomes and thiol proteomes of Young, Old, and  
58 Old mouse hearts treated with elamipretide (Old + SS-31). While our previous work provided analysis of  
59 specific phosphorylation sites via Western blot and a measurement of bulk S-glutathionylation (Chiao et  
60 al., 2020), here we present both broader and more detailed information describing the post-translational  
61 modification of thousands of different proteins.

62

## 63 **RESULTS**

### 64 **Elamipretide Treatment Restores the Thiol Redox Proteome to More Youthful State**

65 Quantitative analysis of protein S-glutathionylation was performed by mass spectrometry, as  
66 previously described (Campbell et al., 2019). Aging resulted in a broad increase in S-glutathionylation that  
67 was reversed by elamipretide (referred to as SS-31 in figures and tables) treatment (Figures 1A and B).  
68 The 50 age-related S-glutathionylation changes with the lowest P-values are shown in Table 1 and the full  
69 set of results can be viewed in Appendix 1. A histogram of the S-glutathionylation occupancy measured at  
70 the peptide level illustrates an age-related increase in S-glutathionylation and shows that the elamipretide  
71 treatment in Old mice produced a general shift in S-glutathionylation almost completely back to the Young  
72 state (Figure 1C). Canonical pathway analysis by Ingenuity Pathway Analysis (IPA) software (QIAGEN) also  
73 shows that many of the significantly affected pathways are linked to mitochondria and/or aging, such as  
74 sirtuin signaling, oxidative phosphorylation, mitochondrial dysfunction, TCA cycle, and NRF2-mediated  
75 oxidative stress response (Figure 1D). Heatmap visualization of S-glutathionylation differences in peptides  
76 of selected pathways further demonstrates that elamipretide treatment strongly and uniformly shifted  
77 the oxidation state of the heart proteome back to that of Young mice (Figure 1E). Our results also show  
78 extensive S-glutathionylation of proteins involved in cardiomyocyte elasticity, such as titin, and that  
79 elamipretide greatly reduces the S-glutathionylation of these residues in aged hearts (Appendix 1; Table  
80 1).

81 The global trend seen in S-glutathionylation by proteomics was further confirmed by an HPLC  
82 assay (Figure 1F). This analysis demonstrates that bulk S-glutathionylation, measured as glutathione  
83 (GSH)/protein after isolation and reduction, was decreased significantly ( $P < 0.05$ ) in the heart following  
84 elamipretide treatment.

85

### 86 **Phosphoproteomics Reveals Age-Related Changes and Elamipretide Effects**

87 We previously described age-based changes to a small set of phosphorylation sites that are  
88 important for cardiac function (Chiao et al., 2020). To determine additional phosphosites that may  
89 regulate heart function, we analyzed the global phosphoproteome of Young, Old, and Old elamipretide-  
90 treated mouse hearts. The 50 differences between groups with the lowest P-values are shown in Table 2  
91 and the full phosphoproteomic results can be found in Appendix 2. Many sites were identified with  
92 changes between groups of unadjusted P-value  $< 0.05$  (Figure 2A,B).

93 Canonical pathway analysis by IPA shows that elamipretide had a significant effect on many of the  
94 pathways that were altered with age and play a known role in cardiac function, such as ILK signaling,  
95 protein kinase A signaling, rhoA signaling, and actin cytoskeleton signaling (Figure 2C). However, when

96 assessing the individual phosphosites involved these pathways, we found that the Young and Old Control  
97 hearts tended to cluster more closely together than with the Old + SS-31 hearts (Figure 2D).

98 To fully contextualize the phosphoproteome results, we also quantified the unmodified  
99 proteomes of the same set of samples (Figure 3A and B). The 50 differentially-regulated proteins with the  
100 lowest P-values are shown in Table 3 while the full proteome results can be found in Appendix 3. Canonical  
101 pathway analysis by IPA revealed that affected pathways were largely related to cell signaling,  
102 metabolism, and structure, with limited overlap between the pathways identified in the phosphorylation  
103 data (Figure 3C). In most pathways, the Old Control and Old + SS-31 results clustered more closely  
104 together than with the Young, though the mitochondrial dysfunction pathway was a notable exception to  
105 this (Figure 3D).

106 The limited overlap between the significantly altered pathways in the phosphoproteomic and  
107 proteomic datasets, and the differential clustering of the groups, indicates that most of the changes found  
108 in the phosphoproteome are driven by changes in signaling and phosphoregulation of these proteins  
109 rather than differences in protein abundance.

110 Based on the large-scale phosphoproteomic results, we selected a subset of phosphorylation sites  
111 for further targeted analysis by parallel reaction monitoring to better assess whether they play a role in  
112 the regulation of the aging heart and restoration of function by SS-31. These targets were selected from  
113 sites that showed an unadjusted P-value < 0.05 in the large-scale phosphoproteomic analysis presented  
114 here, as well as sites of interest identified in our prior study (Chiao et al., 2020). These targets included  
115 phosphorylation sites on titin (Ttn), actinin alpha 2 (Acta2), cMyBP-C, myotilin (Myot), cardiac  
116 phospholamban (Pln), heat shock protein family B member 6 (HSPB6), and creatine kinase M-type (Ckm).  
117 As shown in Figure 4, we found different abundance for many phosphosites in the Young and Old groups,  
118 and some differences were significant. However, elamipretide did not appear to have any significant  
119 effects on the phosphorylation of these sites. Notably, we observed an increase in the unmodified cMyBP-  
120 C containing Ser307 with age (P=0.074) while the corresponding phosphopeptide did not change (Figure  
121 4F). This suggests that the phosphorylation site has high stoichiometry given that there was no change in  
122 abundance when all cMyBP-C peptides were aggregated (Appendix 3). Conversely, Myot showed  
123 significant age-related increases in both phosphorylated and unmodified peptides containing the Ser231  
124 site (Figure 4G and H), indicating the change observed in phosphorylation is due to changes in protein  
125 expression. The full set of PRM results, including peptide sequences used, is provided in Table 4 while  
126 additional information on the sample list and peptide inclusion can be found in Appendix 4.

127

## 128 **Supplemental Data**

129 Full proteomic datasets can be found in the following appendices:

130 Appendix 1: S-Glutathionylation Proteomics Results

131 Appendix 2: DDA Phosphoproteomics Results

132 Appendix 3: DDA Proteomics Results

133 Appendix 4: PRM Phosphoproteomics Sample List and Peptide Inclusion

134 Raw data and Skyline document (ProteomeXchange ID: PXD024247) for PRM phosphorylation  
135 measurements is available at Panorama (<https://panoramaweb.org/SS31PTM.url>). Raw data for S-  
136 glutathionylation is available at MassIVE (<ftp://massive.ucsd.edu/MSV000085329/>). Raw data for large-  
137 scale DDA proteomics and phosphoproteomics have been deposited in the ProteomeXchange Consortium  
138 via the PRIDE partner repository with the dataset identifier PXD026335 (Vizcaíno et al., 2016).

139 Additional figures showing the results of statistical analyses are available in the Supplemental  
140 Data document.

141

## 142 **DISCUSSION**

### 143 **Mitochondrial Thiols are Heavily Oxidized with Age but Elamipretide Rapidly Reverses These Changes**

144 Our data reveal a near universal shift in heart protein thiol oxidation state with age. This is  
145 consistent with the redox stress hypothesis, which states that the loss of function that occurs with age is  
146 due to a shift in the redox state of cells to more oxidizing conditions, resulting in protein thiols becoming  
147 oxidized and disrupting signaling and other important functions of these proteins (Sohal & Orr, 2012).  
148 Elamipretide treatment appeared to rapidly restore the environment of cardiomyocytes to a less oxidizing  
149 state and reversed the majority of the age-related S-glutathionylation after 8 weeks of treatment.

150 The S-glutathionylation data also appear to show an overrepresentation of mitochondrial proteins  
151 based on our pathway analysis. Given that mitochondria are the largest contributor of reactive oxygen  
152 species in the cell, it is not surprising that these pathways were heavily affected and implies potential  
153 damage to mitochondrial proteins. Although the effects of S-glutathionylation are site-specific and  
154 unknown in most cases, alteration of mitochondrial protein thiol oxidation state likely explains our  
155 previous finding that elamipretide further enhances nicotinamide mononucleotide's effects on improving  
156 mitochondrial metabolism in the aged heart when the two are administered simultaneously (Whitson et  
157 al., 2020). This could be due to changes in signaling and/or enzyme activity along mitochondrial pathways  
158 resulting from the difference in S-glutathionylation state.

159 In addition to the reported correlation between phosphorylation changes and diastolic heart  
160 function (Chiao et al., 2020), there are indications that oxidative changes may also contribute to  
161 elamipretide's improvement of diastolic function in aged hearts. A recent study has revealed that cardiac  
162 stiffness is heavily influenced by the oxidation of cysteine residues along titin (Loescher et al., 2020), and  
163 many of these same residues showed enhanced S-glutathionylation with age that was reversed by  
164 elamipretide treatment in our analysis. The combined lower oxidation of essential mitochondrial and  
165 cardiac proteins may be one of the core mechanisms by which elamipretide is able to drastically improve  
166 the function of aged hearts.

167 Notably, these results are similar to what we had previously reported in skeletal muscle tissue,  
168 where we showed the same global shift in thiol redox status, with essential muscle and mitochondrial  
169 proteins being most affected with age and rapidly repaired by elamipretide (Campbell et al., 2019). Thus,  
170 our findings in heart can likely be extrapolated to all muscle tissue, if not to all mitochondrion-rich tissues.

171 While elamipretide has been clearly demonstrated to restore the redox state of aged muscle  
172 tissues to a near-young state, it has yet to be determined whether this can affect more persistent oxidative  
173 modifications of proteins beyond reversible S-glutathionylation, which may also greatly impact tissue  
174 function.

175

### 176 **How Does Elamipretide Regulate Phosphorylation?**

177 Phosphoproteome data were not expected to show the same global shift that the S-  
178 glutathionylation data did, given the more selective mechanisms of regulation of protein phosphorylation.  
179 We report many new sites of interest that should be further examined to gain insight into how heart  
180 protein phosphorylation changes with age and the degree of elamipretide's effect on reversing these  
181 changes. Furthermore, combining these phosphorylation results with protein abundance results  
182 demonstrates that the phosphorylation changes cannot generally be owed to a difference in protein  
183 abundance that maintains the same proportion of phosphorylation and instead represent true regulatory  
184 changes in phosphorylation status. Intriguingly, while elamipretide significantly affected  
185 phosphoregulation in many of the same pathways that aging did, the actual phosphosites impacted were  
186 often different, to the point where the phosphorylation profile of elamipretide-treated Old hearts often  
187 looked more different from Young hearts than untreated Old hearts did (Figure 2D). This seems to indicate  
188 that, while elamipretide has a restorative effect on the level of pathways and function impacted by aging,  
189 it is not always restorative at the level of individual phosphosites. Rather, there are many cases where  
190 elamipretide enhanced phosphorylation of residues that were not affected by age at all.

191           The question also remains of how exactly elamipretide regulates phosphorylation given that there  
192 is no direct mechanism by which it can phosphorylate or dephosphorylate proteins. The most obvious  
193 explanation for the elamipretide treatment's effect on phosphoregulation is that it results in modulation  
194 of kinase and phosphatase activity or abundance. Sites along many phosphatases and phosphatase  
195 regulators, such as PP1B, PP14C, PP2AA, and PP2BA and kinases, such as MAPK1, MAPK12, MAPK14, and  
196 PDK1, had significantly altered S-glutathionylation with age and elamipretide treatment (Appendix 1). On  
197 the level of abundance, PDK2 was the only phosphoregulator significantly affected by age, but with only  
198 a modest 1.45-fold downregulation and no significant effect by elamipretide (Appendix 3). Thus, the data  
199 we have presented here suggests that elamipretide's impact on phosphorylation could be influenced by  
200 its alteration of the oxidation state of the proteome. This indicates a potential point of convergence in  
201 elamipretide's effect on both types of PTMs studied, with thiol redox proteome changes playing a role in  
202 regulating the phosphoproteome changes. Confirming which kinases and phosphatases play a role in aging  
203 and elamipretide's effects, and whether they are sensitive to oxidative modifications, could be beneficial  
204 to further understand cardiac aging and the mechanisms of elamipretide and should be a focus of future  
205 research.

206

## 207 **Conclusions**

208           These results expand our understanding of how aging impacts the post-translational modification  
209 states of cardiac proteins and indicate that elamipretide has a potent effect on the thiol redox status of  
210 essential mitochondrial and muscle proteins while also influencing the phosphorylation of various  
211 proteins in cardiomyocytes. With these data we postulate phosphatases could be a potentially critical  
212 mediator of elamipretide's effects, a possibility that needs further investigation. In total, the data we have  
213 presented here includes many new targets for study in the restoration of cardiac function in old age and  
214 has contributed to defining how elamipretide confers its benefits to cardiac healthspan.

215

## 216 **EXPERIMENTAL PROCEDURES**

### 217 **Animal Use and Care**

218           All mice used in this study were males of the C57BL/6 strain. Young and Old mice were obtained  
219 from the National Institute on Aging Charles River colony and further aged to 5-6 and 24 months,  
220 respectively, before starting the study. Mice were housed at 20°C under diurnal conditions in an AAALAC  
221 accredited facility under Institutional Animal Care and Use Committee supervision with ad-libitum access  
222 to food and water. Old mice were randomly assigned to Control and elamipretide (Old + SS-31) groups.



223

## 224 **Drug Administration and Treatment Groups**

225 Elamipretide was provided by Stealth BioTherapeutics (Newton, MA) and administered at a 3  
226 mg/kg body weight/day dosage through osmotic minipumps (ALZET, Cupertino, CA) implanted surgically  
227 under the skin on the left dorsal side of the mice. Old Control mice were implanted with saline-containing  
228 pumps. After 4 weeks, the original minipump was surgically removed and a new minipump was implanted  
229 to continue the treatment for another 4 weeks.

230

## 231 **Euthanasia and Tissue Handling**

232 Mice were euthanized by live cervical dislocation. Hearts were immediately removed, rinsed with  
233 PBS, and weighed. Tissue was cut into ~2 mm<sup>3</sup> chunks and snap frozen in liquid N<sub>2</sub> to store for further  
234 processing. Frozen tissue was mechanically lysed into a fine powder using a TissueLyser II (QIAGEN, Hilden,  
235 Germany) prior to mass spectroscopy-based procedures, with the exception of protein S-  
236 glutathionylation.

237

## 238 **Large-Scale DDA Abundance and Phosphorylation Analysis**

### 239 *Sample preparation for proteomic analysis*

240 About 50 mg of ground tissue were resuspended in 1600 µL of lysis buffer composed of 8M urea,  
241 75mM NaCl, 50 mM Tris pH 8.2, and a mix of protease inhibitors (Roche Complete EDTA-free) and  
242 phosphatase inhibitors (50 mM beta-glycerophosphate, 10 mM sodium pyrophosphate, 1 mM sodium  
243 orthovanadate and 50 mM sodium fluoride). Samples were then subjected to 2 cycles of bead beating (1  
244 min beating, 1.5 min rest) with 0.5mm diameter zirconia beads and sonicated for 5 min in ice. Samples  
245 were centrifuged at 4°C to remove debris and lysate protein concentration was measured by BCA assay  
246 (Thermo Fisher Scientific, Waltham, MA). Protein was reduced with 5 mM dithiothreitol (DTT) for 30 min  
247 at 55°C and alkylated with 15 mM iodoacetamide in the dark for 30 min at room temperature. The  
248 alkylation reaction was quenched by incubating with additional 5 mM DTT for 15 min at room  
249 temperature. Samples were diluted five-fold with 50 mM Tris pH 8.2. Proteolytic digestion was performed  
250 by adding trypsin at 1:200 enzyme to protein ratio and incubating at 37°C overnight. The digestion was  
251 quenched by addition of trifluoroacetic acid to pH 2. Samples were centrifuged to remove insoluble  
252 material and peptides were desalted over a 50 mg tC18 SepPak cartridge (Waters Corp, Milford, MA).  
253 Briefly, cartridges were conditioned with 1 mL of methanol, 3 mL of 100% acetonitrile, 1 mL of 70%  
254 acetonitrile, 0.25% acetic acid and 1 mL of 40% acetonitrile, 0.5% acetic acid; and equilibrated with 3 mL

255 of 0.1% trifluoroacetic acid. Then peptide samples were loaded into the cartridges, washed with 3 mL of  
256 0.1% trifluoroacetic acid and 1 mL of 0.5% acetic acid, and then sequentially eluted first with 0.5mL of  
257 40% acetonitrile, 0.5% acetic acid and then with 0.5 mL of 70% acetonitrile, 0.25% acetic acid. 20 µg and  
258 500 µg aliquots of eluted peptides were dried by vacuum centrifugation and stored at -80°C for proteomic  
259 and phosphoproteomic analysis, respectively.

#### 260 *Phosphopeptide enrichment*

261 Phosphopeptide enrichment was done by immobilized metal affinity chromatography (IMAC). 500  
262 µg of peptides were resuspended in 150 µl 80% acetonitrile, 0.1% trifluoroacetic acid. To prepare IMAC  
263 slurry, Ni-NTA magnetic agarose (Qiagen) was stripped with 40 mM EDTA for 30 min, reloaded with 10  
264 mM FeCl<sub>3</sub> for 30 min, washed 3 times and resuspended in 80% acetonitrile, 0.1% trifluoroacetic acid.  
265 Phosphopeptide enrichment was performed using a KingFisher Flex robot (Thermo Fisher Scientific)  
266 programmed to incubate peptides with 150 µl 5% bead slurry for 30 min, wash 3 times with 150 µl 80%  
267 acetonitrile, 0.1% trifluoroacetic acid, and elute with 60 µl 1:1 acetonitrile:1% ammonium hydroxide. The  
268 eluates were acidified with 30 µl 10% formic acid, 75% acetonitrile, dried by vacuum centrifugation, and  
269 stored at -80°C until mass spectrometry analysis.

#### 270 *LC-MS/MS analysis*

271 Peptide and phosphopeptide samples were dissolved in 4% formic acid, 3% acetonitrile, loaded  
272 onto a 100 µm ID x 3 cm precolumn packed with Reprosil C18 3 µm beads (Dr. Maisch GmbH), and  
273 separated by reverse phase chromatography on a 100 µm ID x 30 cm analytical column packed with 1.9  
274 µm beads of the same material and housed into a column heater set at 50°C. As peptides eluted off the  
275 column, they were analyzed online by mass spectrometry. Peptides for proteome analysis were eluted  
276 into a Q-Exactive (Thermo Fisher Scientific) mass spectrometer by gradient elution delivered by an Easyll  
277 nanoLC system (Thermo Fisher Scientific). The gradient was 9- 30% acetonitrile in 0.125% formic acid over  
278 the course of 90 min. The total duration of the method, including column wash and equilibration was 120  
279 min. All MS spectra were acquired on the orbitrap mass analyzer and stored in centroid mode. Full MS  
280 scans were acquired from 300 to 1500 m/z at 70,000 FWHM resolution with a fill target of 3E6 ions and  
281 maximum injection time of 100 ms. The 20 most abundant ions on the full MS scan were selected for  
282 fragmentation using 2 m/z precursor isolation window and beam-type collisional-activation dissociation  
283 (HCD) with 26% normalized collision energy. MS/MS spectra were collected at 17,500 FWHM resolution  
284 with a fill target of 5E4 ions and maximum injection time of 50 ms. Fragmented precursors were  
285 dynamically excluded from selection for 30 s. Phosphopeptides for phosphoproteome analysis were  
286 eluted into a Velos Orbitrap (Thermo Fisher Scientific) mass spectrometer by gradient elution delivered

287 by an Easy1000 nanoLC system (Thermo Fisher Scientific). The gradient was 9-23% acetonitrile in 0.125%  
288 formic acid over the course of 90 min. The total duration of the method, including column wash and  
289 equilibration was 120 min. Full MS scans were acquired in the orbitrap mass analyzer and recorded in  
290 centroid mode. Mass range was 300 to 1500, resolution 60,000 FWHM, fill target 3E6 ions, and maximum  
291 injection time 100 ms. Each MS scan was followed by up to 20 data-dependent MS/MS scans on the top  
292 20 most intense precursor ions with 2 m/z isolation window, collision-induced dissociation (CID) with 35%  
293 normalized collision energy and acquired on the ion trap. Fragmented precursors were dynamically  
294 excluded from selection for 30 s.

#### 295 *MS data analysis*

296 Acquired mass spectra raw files were converted to mzXML format and MS/MS spectra were  
297 searched against the mouse SwissProt database including isoforms (downloaded May 10, 2015, 24,750  
298 protein sequences) using the Comet search algorithm (version 2015.02 rev.2) (Eng et al., 2013). Search  
299 parameters included full tryptic enzyme specificity with up to two missed cleavages permitted, mass  
300 tolerance of 50 ppm for the precursor and 1 Da for fragments ions, fixed modifications of  
301 carbamidomethylation on cysteines, and as variable modifications methionine oxidation and protein N-  
302 terminal acetylation. Phosphorylation on serine, threonine and tyrosine residues was also included as  
303 variable modification in phosphoproteome analysis. Peptide matches were filtered to <1% false-discovery  
304 rate, using the target-decoy database strategy and Percolator (version 3.1.2) (Käll et al., 2007). Protein  
305 inference was carried out using Protein Prophet (Nesvizhskii et al., 2003) and protein groups were filtered  
306 at  $\geq 90\%$  probability score. Peptides were quantified using in-house software by peak-area integration of  
307 MS1 spectra, peptide intensities were added for every protein group for protein intensity measurements  
308 whereas phosphopeptide intensities were treated individually. Phosphorylation site localization was  
309 performed using an in-house implementation of Ascore (Beausoleil et al., 2006) and sites with an Ascore  
310  $> 13$  were considered localized, which corresponds to a  $>95\%$  probability of correct assignment ( $p < 0.05$ ).  
311 If  $\text{Ascore} < 13$  the most likely position is indicated including into brackets the range of residues towards the  
312 N and C termini of the phosphopeptide where other phospho-acceptor sites reside. Perseus software  
313 (Tyanova et al., 2016) was used for bioinformatic and statistical analysis using log<sub>2</sub> transformed data from  
314 total intensity normalized protein intensities and median normalized phosphopeptide intensities from  
315 each run.

316

#### 317 **Targeted PRM Phosphoproteomics**

318 Powdered heart tissue was solubilized in 50 mM triethylammonium bicarbonate (TEAB) pH 7.55  
319 buffer with 5% SDS, 2 mM MgCl<sub>2</sub>, and HALT phosphatase and protease inhibitors (Thermo Fisher  
320 Scientific). Eight-hundred ng of enolase were added to each 50 µg sample for normalization. Lysates were  
321 bound to S-Trap mini columns, washed with TEAB-buffered methanol and a 1:1 mix of chloroform and  
322 methanol, digested with trypsin, and eluted following the manufacturer's protocol (Profiti, Farmingdale,  
323 NY). Eluents were dried using a CentriVap Concentrator (LABCONCO, Kansas City, MO) and reconstituted  
324 in 0.1% formic acid.

325 One µg of each sample with 50 femtomole of heavy labeled Peptide Retention Time Calibrant  
326 (PRTC) mixture (Thermo Fisher Scientific, cat # 88321) was loaded onto a 30 cm fused silica picofrit (New  
327 Objective, Littleton, MA) 75 µm column and 4 cm 150 µm fused silica Kasil1 (PQ Corporation, Malvern,  
328 PA) frit trap loaded with 3 µm Reprosil-Pur C18 (Dr. Maisch) reverse-phase resin analyzed with a Thermo  
329 Easy-nLC 1200. The PRTC mixture is used to assess system suitability (QC) before and during analysis.  
330 Buffer A was 0.1% formic acid in water and buffer B was 0.1% formic acid in 80% acetonitrile. The 40-  
331 minute system suitability gradient consisted of a 0 to 16% B in 5 minutes, 16 to 35% B in 20 minutes, 35  
332 to 75% B in 1 minute, 75 to 100% B in 5 minutes, followed by a wash of 9 minutes and a 30-minute column  
333 equilibration. The 110-minute sample LC gradient consists of a 2 to 7% for 1 minutes, 7 to 14% B in 35  
334 minutes, 14 to 40% B in 55 minutes, 40 to 60% B in 5 minutes, 60 to 98% B in 5 minutes, followed by a 9-  
335 minute wash and a 30-minute column equilibration. Peptides were eluted from the column with a 50°C  
336 heated source (CorSolutions, Ithica, NY) and electrosprayed into a Thermo Orbitrap Fusion Lumos Mass  
337 Spectrometer with the application of a distal 3 kV spray voltage. For the sample digest, a full-scan mass  
338 spectrum at 60,000 resolution with a mass range of 400 to 2000 m/z, AGC target of 4e5, 50 ms maximum  
339 injection time was followed by 81 unscheduled PRM scans at 15,000 resolution with a mass range of 150  
340 to 2000 m/z, AGC target of 5e5, 22 ms maximum injection time and 27% NCE. Application of the mass  
341 spectrometer and LC solvent gradients are controlled by the ThermoFisher XCalibur (version 3.3.2782.34)  
342 data system.

343 Thermo RAW files were converted to mzML format using Proteowizard (version 3.0.19113) and  
344 imported into a Skyline document (daily version 20.1.9.234) configured with inclusion peptides (Appendix  
345 3). A DDA with MS1 filtering search was performed using MS Amanda (with built-in Percolator) in Skyline  
346 filtering for PRM peptides with a default cut-off of 0.95. Parameters used included a fixed  
347 carbamidomethyl modification of 57 Da on Cysteine, up to 3 variable phosphorylation modifications of 80  
348 Da on Serine and Threonine, MS1 settings of precursor charge state of 2 and a mass accuracy of 10 ppm  
349 with centroided peaks. MS2 settings were fully tryptic allowing for 2 missed cleavages, fragment b- and y-

350 ions, retention time filtering of scans within 5 minutes of MS2 IDs at a tolerance of 10 ppm using the  
351 Uniprot mouse canonical FASTA. MS Amanda mzid output files were imported with default cut-off of 0.95  
352 to build a PRM spectral library. Data was then normalized to TIC and mean normalized areas of peptides  
353 were exported from Skyline. Due to differences in detection of peptides, only the first batch of samples  
354 was able to be quantified for the desired set of peptides. Only peptides that were detected in both the  
355 phosphorylated and unphosphorylated state are presented in this paper.

356

### 357 **Thiol Redox Proteomics**

358 A tandem mass tag (TMT)-based quantitative redox proteomics approach was used to measure  
359 the relative protein-SSG modification levels in Young, Old Control, and Old + SS-31 heart tissue exactly as  
360 described previously for skeletal muscle tissue (Kramer et al., 2018).

361

### 362 **Protein S-Glutathionylation HPLC Analysis**

363 Previously snap-frozen heart tissue was homogenized in 1 ml pH 8 HEPES buffer containing 75  
364 mM monobromobimane (MBB). The sample was incubated for 30 min at room temperature to label free  
365 thiols with MBB, and then acidified with 10% sulfosalicylic acid (SSA) to precipitate proteins and stabilize  
366 GSH-bimane free conjugate. The free thiol supernatant was then removed and the protein pellet was  
367 washed 2X with an aliquot of 10% SSA followed by re-solubilization of the protein for 30 min at 60 °C in  
368 0.5 N NaOH. After re-solubilization of the protein pellet the sample was brought to pH 7 with 0.1 N HCL,  
369 and the protein-bound glutathione was released by a 30-min incubation in 10 mM tris(2-  
370 carboxyethyl)phosphine (TCEP). The solution was then incubated with 1 mM MBB for 30-minutes. The  
371 GSH-bimane conjugate was stabilized by addition of 10% SSA to pH 2, and the sample was then centrifuged  
372 to pellet precipitated proteins. A 50 ul aliquot of the supernatant was then injected into a Shimadzu HPLC  
373 for quantitation of the GSH-bimane conjugate as previously reported (White et al., 1999), using total  
374 protein levels from split samples as the denominator (Bradford protein assay, Bio-Rad, Hercules, CA).

375

### 376 **Statistical Analysis**

377 Statistical analyses of large-scale proteomics data are described in the above sections. Canonical  
378 pathway analysis was performed using Ingenuity Pathway Analysis (IPA) software (QIAGEN). PRM results,  
379 were analyzed by one-way ANOVA as appropriate using Prism software (GraphPad Software, San Diego,  
380 CA). All bar charts are plotted as means  $\pm$  SEM.

381

382 **ACKNOWLEDGEMENTS**

383 Funding for this research was provided by the UW Genetic Approaches to Aging Training Grant  
384 (T32AG000057-40), NIH/NIA grant P01AG001751, NIH/NIEHS grant P30ES007033, and the UW Nathan  
385 Shock Center. The thiol redox proteomics experiments described herein were performed in the  
386 Environmental Molecular Sciences Laboratory, Pacific Northwest National Laboratory, a national  
387 scientific user facility sponsored by the Department of Energy under Contract DE-AC05-76RLO 1830. SS-  
388 31 was provided by Stealth Therapeutics (Newton, MA) free of charge. Stealth Therapeutics did not play  
389 any role in the experimental design, data collection, or authorship of this research.

390

391 **REFERENCES**

- 392 Beausoleil, S. A., Villén, J., Gerber, S. A., Rush, J., & Gygi, S. P. (2006). A probability-based approach for  
393 high-throughput protein phosphorylation analysis and site localization. *Nature Biotechnology*,  
394 24(10), 1285–1292. <https://doi.org/10.1038/nbt1240>
- 395 Campbell, M. D., Duan, J., Samuelson, A. T., Gaffrey, M. J., Merrihew, G. E., Egertson, J. D., Wang, L.,  
396 Bammler, T. K., Moore, R. J., White, C. C., Kavanagh, T. J., Voss, J. G., Szeto, H. H., Rabinovitch, P. S.,  
397 MacCoss, M. J., Qian, W. J., & Marcinek, D. J. (2019). Improving mitochondrial function with SS-31  
398 reverses age-related redox stress and improves exercise tolerance in aged mice. *Free Radical*  
399 *Biology and Medicine*, 134, 268–281. <https://doi.org/10.1016/j.freeradbiomed.2018.12.031>
- 400 Chavez, J. D., Tang, X., Campbell, M. D., Reyes, G., Kramer, P. A., Stuppard, R., Keller, A., Marcinek, D. J.,  
401 & Bruce, J. E. (2019). Mitochondrial protein interaction landscape of SS-31. *BioRxiv*, 739128.  
402 <https://doi.org/10.1101/739128>
- 403 Chiao, Y. A., Zhang, H., Sweetwyne, M., Whitson, J., Ting, Y. S., Basisty, N., Pino, L. K., Quarles, E.,  
404 Nguyen, N. H., Campbell, M. D., Zhang, T., Gaffrey, M. J., Merrihew, G., Wang, L., Yue, Y., Duan, D.,  
405 Granzier, H. L., Szeto, H. H., Qian, W. J., ... Rabinovitch, P. (2020). Late-life restoration of  
406 mitochondrial function reverses cardiac dysfunction in old mice. *ELife*, 9, 1–26.  
407 <https://doi.org/10.7554/eLife.55513>
- 408 Dai, D.-F., Chen, T., Johnson, S. C., Szeto, H., & Rabinovitch, P. S. (2012). Cardiac aging: from molecular  
409 mechanisms to significance in human health and disease. *Antioxidants & Redox Signaling*, 16(12),  
410 1492–1526. <https://doi.org/10.1089/ars.2011.4179>
- 411 Eng, J. K., Jahan, T. A., & Hoopmann, M. R. (2013). Comet: An open-source MS/MS sequence database

- 412 search tool. *Proteomics*, 13(1), 22–24. <https://doi.org/10.1002/pmic.201200439>
- 413 Grek, C. L., Zhang, J., Manevich, Y., Townsend, D. M., & Tew, K. D. (2013). Causes and consequences of  
414 cysteine s-glutathionylation. In *Journal of Biological Chemistry* (Vol. 288, Issue 37, pp. 26497–  
415 26504). American Society for Biochemistry and Molecular Biology.  
416 <https://doi.org/10.1074/jbc.R113.461368>
- 417 Heron, M., & Anderson, R. N. (2016). Changes in the Leading Cause of Death: Recent Patterns in Heart  
418 Disease and Cancer Mortality. *NCHS Data Brief*, 254, 1–8.
- 419 Käll, L., Canterbury, J. D., Weston, J., Noble, W. S., & MacCoss, M. J. (2007). Semi-supervised learning for  
420 peptide identification from shotgun proteomics datasets. *Nature Methods*, 4(11), 923–925.  
421 <https://doi.org/10.1038/nmeth1113>
- 422 Kramer, P. A., Duan, J., Gaffrey, M. J., Shukla, A. K., Wang, L., Bammler, T. K., Qian, W. J., & Marcinek, D.  
423 J. (2018). Fatiguing contractions increase protein S-glutathionylation occupancy in mouse skeletal  
424 muscle. *Redox Biology*, 17, 367–376. <https://doi.org/10.1016/j.redox.2018.05.011>
- 425 Kuka, S., Tatarkova, Z., Racay, P., Lehotsky, J., Dobrota, D., & Kaplan, P. (2014). Effect of aging on  
426 formation of reactive oxygen species by mitochondria of rat heart. *General Physiology and*  
427 *Biophysics*, 32(03), 415–420. [https://doi.org/10.4149/gpb\\_2013049](https://doi.org/10.4149/gpb_2013049)
- 428 Loescher, C. M., Breitkreuz, M., Li, Y., Nickel, A., Unger, A., Dietl, A., Schmidt, A., Mohamed, B. A., Kötter,  
429 S., Schmitt, J. P., Krüger, M., Krüger, M., Toischer, K., Maack, C., Leichert, L. I., Hamdani, N., & Linke,  
430 W. A. (2020). Regulation of titin-based cardiac stiffness by unfolded domain oxidation (UnDOx).  
431 *Proceedings of the National Academy of Sciences of the United States of America*, 117(39), 24545–  
432 24556. <https://doi.org/10.1073/pnas.2004900117>
- 433 Mitchell, W., Ng, E. A., Tamucci, J. D., Boyd, K. J., Sathappa, M., Coscia, A., Pan, M., Han, X., Eddy, N. A.,  
434 May, E. R., Szeto, H. H., & Alder, N. N. (2020). The mitochondria-targeted peptide SS-31 binds lipid  
435 bilayers and modulates surface electrostatics as a key component of its mechanism of action.  
436 *Journal of Biological Chemistry*, 295(21), 7452–7469. <https://doi.org/10.1074/jbc.RA119.012094>
- 437 Morimoto, R. I., & Cuervo, A. M. (2014). Proteostasis and the aging proteome in health and disease. *The*  
438 *Journals of Gerontology. Series A, Biological Sciences and Medical Sciences*, 69 Suppl 1, S33-8.  
439 <https://doi.org/10.1093/gerona/glu049>



- 440 Nesvizhskii, A. I., Keller, A., Kolker, E., & Aebersold, R. (2003). A statistical model for identifying proteins  
441 by tandem mass spectrometry. *Analytical Chemistry*, 75(17), 4646–4658.  
442 <https://doi.org/10.1021/ac0341261>
- 443 Santos, A. L., & Lindner, A. B. (2017). Protein Posttranslational Modifications: Roles in Aging and Age-  
444 Related Disease. *Oxidative Medicine and Cellular Longevity*, 2017, 5716409.  
445 <https://doi.org/10.1155/2017/5716409>
- 446 Sohal, R. S., & Orr, W. C. (2012). The redox stress hypothesis of aging. In *Free Radical Biology and*  
447 *Medicine* (Vol. 52, Issue 3, pp. 539–555). Free Radic Biol Med.  
448 <https://doi.org/10.1016/j.freeradbiomed.2011.10.445>
- 449 Tyanova, S., Temu, T., Sinitcyn, P., Carlson, A., Hein, M. Y., Geiger, T., Mann, M., & Cox, J. (2016). The  
450 Perseus computational platform for comprehensive analysis of (prote)omics data. In *Nature*  
451 *Methods* (Vol. 13, Issue 9, pp. 731–740). Nature Publishing Group.  
452 <https://doi.org/10.1038/nmeth.3901>
- 453 Vizcaíno, J. A., Csordas, A., Del-Toro, N., Dienes, J. A., Griss, J., Lavidas, I., Mayer, G., Perez-Riverol, Y.,  
454 Reisinger, F., Ternent, T., Xu, Q. W., Wang, R., & Hermjakob, H. (2016). 2016 update of the PRIDE  
455 database and its related tools. *Nucleic Acids Research*, 44(D1), D447–D456.  
456 <https://doi.org/10.1093/nar/gkv1145>
- 457 Walther, D. M., Kasturi, P., Mann, M., Ulrich, F., & Correspondence, H. (2015). *Widespread Proteome*  
458 *Remodeling and Aggregation in Aging C.&nbsp;elegans*. <https://doi.org/10.1016/j.cell.2015.03.032>
- 459 White, C. C., Krejsa, C. J., Eaton, D. L., & Kavanagh, T. J. (1999). HPLC-Based Assays for Enzymes of  
460 Glutathione Biosynthesis. *Current Protocols in Toxicology*, 00(1), 6.5.1-6.5.14.  
461 <https://doi.org/10.1002/0471140856.tx0605s00>
- 462 Whitson, J. A., Bitto, A., Zhang, H., Sweetwyne, M. T., Coig, R., Bhayana, S., Shankland, E. G., Wang, L.,  
463 Bammler, T. K., Mills, K. F., Imai, S., Conley, K. E., Marcinek, D. J., & Rabinovitch, P. S. (2020). SS-31  
464 and NMN: Two paths to improve metabolism and function in aged hearts. *Aging Cell*.  
465 <https://doi.org/10.1111/acel.13213>
- 466 Zhang, H., Alder, N. N., Wang, W., Szeto, H., Marcinek, D. J., & Rabinovitch, P. S. (2020). Reduction of  
467 elevated proton leak rejuvenates mitochondria in the aged cardiomyocyte. *ELife*, 9, 1–18.  
468 <https://doi.org/10.7554/ELIFE.60827>



469

470 **SUPPORTING INFORMATION**

471 **TABLES**

472 **Table 1. Top 50 age-related S-glutathionylation changes in mouse hearts.** Bold numbers indicate  
 473 significance (FDR<0.1). Ordered by lowest P-value in Young vs Old Control comparison. Full results can be  
 474 found in Appendix 1.

| Peptide                                            | Maps to Protein | Fold Change Relative to Old Control |              |
|----------------------------------------------------|-----------------|-------------------------------------|--------------|
|                                                    |                 | Young                               | Old SS-31    |
| <i>K.VCIVGSGNWGSAIAK.I</i>                         | <i>Gpd1</i>     | <b>-1.42</b>                        | <b>-1.20</b> |
| <i>R.SNTGGQAFPQCVDHWQILPGDPFDNSSRPSQVVAETR.K</i>   | <i>Eef2</i>     | <b>-1.69</b>                        | <b>-1.18</b> |
| <i>R.YADLTEDQLPSCESLKDTIAR.A</i>                   | <i>Pgam1</i>    | <b>-1.45</b>                        | <b>-1.22</b> |
| <i>R.GFLTERDDILCPDCGKDI.-</i>                      | <i>Fhl2</i>     | <b>-1.51</b>                        | <b>-1.35</b> |
| <i>K.AEFASACTPGLHVDLSAAGSEIKPEVSSSMPAAVDVLR.T</i>  | <i>Perm1</i>    | <b>-1.36</b>                        | -1.23        |
| <i>R.WLGGTCVNVGCIPIK.K</i>                         | <i>Txnrd1</i>   | <b>-1.39</b>                        | <b>-1.19</b> |
| <i>K.CEFDPLHTVLLK.D</i>                            | <i>Cobll1</i>   | <b>-1.47</b>                        | <b>-1.33</b> |
| <i>R.LDGNPLTQSSLPPDMEYELR.V</i>                    | <i>Lum</i>      | <b>-1.46</b>                        | <b>-1.25</b> |
| <i>R.HLLPLVQCPTLIVHGEKDPLVPR.F</i>                 | <i>Bphl</i>     | <b>-1.49</b>                        | <b>-1.41</b> |
| <i>R.AGKPVICATQM*LESMIK.K</i>                      | <i>Pkm</i>      | <b>-1.53</b>                        | <b>-1.28</b> |
| <i>K.SSFATPGVNVGLFCSTPAVALGR.A</i>                 | <i>Echdc3</i>   | <b>-1.56</b>                        | <b>-1.28</b> |
| <i>K.CNENYTTDFIFNLYSEEGK.G</i>                     | <i>Pfkm</i>     | <b>-1.61</b>                        | <b>-1.39</b> |
| <i>K.GLIAAICAGPTALLAH.E</i>                        | <i>Park7</i>    | <b>-2.01</b>                        | -1.77        |
| <i>R.KTETVCTFQDGALVQHQQWDGK.E</i>                  | <i>Fabp5</i>    | <b>-1.57</b>                        | <b>-1.34</b> |
| <i>R.EGVM*EFLLANHPLDC#PICDQGGEC#DLQDQSMFSGDR.S</i> | <i>Ndufs1</i>   | <b>-2.30</b>                        | -1.53        |
| <i>K.VIDVTVPLQCLVK.D</i>                           | <i>Dnajc11</i>  | <b>-1.49</b>                        | <b>-1.32</b> |
| <i>R.PFDIRTECFVPDDKEEYVK.A</i>                     | <i>Myh6</i>     | <b>-1.32</b>                        | -1.27        |
| <i>K.EKPYFPIPEDCTFIQNVPLEDR.V</i>                  | <i>Hnrnpu</i>   | <b>-1.52</b>                        | <b>-1.29</b> |
| <i>K.SSAAQAIHPGYGFLSENMEFAELCK.Q</i>               | <i>Mccc1</i>    | <b>-1.46</b>                        | <b>-1.27</b> |
| <i>K.LCYVALDFENEM*ATAASSSSLEK.S</i>                | <i>Acta2</i>    | <b>-1.58</b>                        | <b>-1.37</b> |
| <i>R.SSLWPMTFGLAC#CAVEMMHMAAPR.Y</i>               | <i>Ndufs7</i>   | <b>-4.07</b>                        | -2.30        |
| <i>K.YGALVICETPEQIANLEEVGR.R</i>                   | <i>Tsfm</i>     | <b>-1.57</b>                        | <b>-1.29</b> |
| <i>K.KWDTCAPEVILHAVGGK.L</i>                       | <i>Bpnt1</i>    | <b>-1.69</b>                        | <b>-1.48</b> |
| <i>R.QELQVIADLCVK.H</i>                            | <i>Kyat3</i>    | <b>-1.40</b>                        | <b>-1.25</b> |
| <i>K.SLCPETWPMWAGRPQDGVAVLVR.H</i>                 | <i>Myo1c</i>    | <b>-1.46</b>                        | -1.35        |
| <i>R.SAVQYAECQSK.A</i>                             | <i>Manba</i>    | <b>-1.21</b>                        | -1.17        |
| <i>R.IDVAVNCAGIAVAIK.T</i>                         | <i>Hsd17b10</i> | <b>-1.95</b>                        | <b>-1.52</b> |
| <i>K.ELLFYCSLPQSR.E</i>                            | <i>Snta1</i>    | <b>-1.45</b>                        | <b>-1.36</b> |
| <i>K.DIRVCLVEK.A</i>                               | <i>Etfdh</i>    | <b>-1.65</b>                        | <b>-1.42</b> |
| <i>R.SCQTALAEILDVLR.A</i>                          | <i>lars2</i>    | <b>-1.61</b>                        | -1.45        |
| <i>K.LCYVALDFEQEM*ATAASSSSLEK.S</i>                | <i>Actb</i>     | <b>-1.69</b>                        | <b>-1.41</b> |
| <i>K.TVVNISSLCALQPYK.G</i>                         | <i>Spr</i>      | <b>-1.54</b>                        | <b>-1.32</b> |
| <i>K.STQFEYAWCLVR.S</i>                            | <i>Fis1</i>     | <b>-1.44</b>                        | <b>-1.28</b> |
| <i>K.CAELEELK.T</i>                                | <i>Tpm1</i>     | <b>-1.66</b>                        | -1.22        |

|                                                     |                |              |              |
|-----------------------------------------------------|----------------|--------------|--------------|
| <i>K.VGKDELFALEQSCAQVVLQAANER.N</i>                 | <i>Fscn1</i>   | <b>-2.37</b> | <b>-1.76</b> |
| <i>K.MLTEAIMHDCVVK.L</i>                            | <i>Eif4g1</i>  | <b>-1.50</b> | <b>-1.32</b> |
| <i>K.KLNCQVIGASVDSHFCHLAWINTPK.K</i>                | <i>Prdx1</i>   | <b>-1.40</b> | <b>-1.26</b> |
| <i>K.ALAGCDFLTISPK.L</i>                            | <i>Taldo1</i>  | <b>-1.76</b> | <b>-1.38</b> |
| <i>K.LTHAAPCMLFMK.G</i>                             | <i>Glrx3</i>   | <b>-1.33</b> | <b>-1.21</b> |
| <i>K.SGSTVFAEIQGVIDACIK.L</i>                       | <i>Ap3m1</i>   | <b>-2.10</b> | <b>-1.77</b> |
| <i>K.NDPPMEAAGFTAQVILNHPGQISAGYAPVLDCHTAHIACK.F</i> | <i>Eef1a1</i>  | <b>-1.48</b> | <b>-1.29</b> |
| <i>R.CNSVLPGFATPMTQK.M</i>                          | <i>Hsd17b8</i> | <b>-1.37</b> | <b>-1.21</b> |
| <i>K.CPKPVIAAIHGGCIGGGVLDLVSACDIR.Y</i>             | <i>Ech1</i>    | <b>-1.42</b> | <b>-1.27</b> |
| <i>R.NAGIEAQVWKPSCFK.-</i>                          | <i>Synpo</i>   | <b>-1.91</b> | <b>-1.54</b> |
| <i>K.ISNVGEDSCTVQWEPPAYDGGQPVLGYILER.K</i>          | <i>cMyBP-C</i> | <b>-1.46</b> | <b>-1.31</b> |
| <i>K.TGQATVASGIPAGWMGLDCGTESSKK.Y</i>               | <i>Pgk1</i>    | <b>-1.37</b> | <b>-1.18</b> |
| <i>K.TYILTCEHDVLRDDGIMYAK.R</i>                     | <i>Nceh1</i>   | <b>-2.40</b> | <b>-1.67</b> |
| <i>R.ILEGMGVTFHCK.M</i>                             | <i>Ttn</i>     | <b>-1.48</b> | <b>-1.32</b> |
| <i>K.ILDVCGGGLLTEPLGR.L</i>                         | <i>Coq3</i>    | <b>-1.55</b> | <b>-1.28</b> |
| <i>R.KGLIAAICAGPTALLAHEVGFCK.V</i>                  | <i>Park7</i>   | <b>-2.10</b> | <b>-1.69</b> |

475

476 **Table 2. Top 50 age-related phosphorylation changes in mouse hearts.** Bold indicates unadjusted P-  
 477 value < 0.05. Ordered by lowest P-value in Young vs Old Control comparison. Full results can be found in  
 478 Appendix 2.

| Peptide (@ indicates site of phosphorylation) | Maps to Protein Phosphorylation Site(s) | Fold Change Relative to Old Control |             |
|-----------------------------------------------|-----------------------------------------|-------------------------------------|-------------|
|                                               |                                         | Young                               | Old SS-31   |
| <i>DALLGSNPNKPS@PPSSPSSR</i>                  | <i>Myom1_S863</i>                       | <b>3.53</b>                         | -1.12       |
| <i>ILNPAAIPEGQFIDS@R</i>                      | <i>Myh6_S740</i>                        | <b>1.29</b>                         | 1.41        |
| <i>SNLKPdVEHCTGAGTGS@PLEEEVR</i>              | <i>Rbpms2_S18</i>                       | <b>-1.77</b>                        | -1.06       |
| <i>GAPVPSTGAPPS@PK</i>                        | <i>Naca_S765</i>                        | <b>-2.00</b>                        | 1.04        |
| <i>GIS@LEEGALPDVSATR</i>                      | <i>Xirp1_S295</i>                       | <b>2.09</b>                         | 1.06        |
| <i>GAPNALAESPAS@PK</i>                        | <i>Naca_S1285</i>                       | <b>-1.96</b>                        | 1.01        |
| <i>KAS@LKDSGEYTCETEASK</i>                    | <i>Obscn_S3321</i>                      | <b>1.94</b>                         | 1.24        |
| <i>TVS@QESLTPGKLEINFEQLLR</i>                 | <i>Nexn_S296</i>                        | <b>-2.07</b>                        | -1.53       |
| <i>IYSHS@GEDIAFGCK</i>                        | <i>Cfh_S1198</i>                        | <b>2.85</b>                         | 1.40        |
| <i>VMHTQCHSTPDS@AEDVRK</i>                    | <i>Ahsg_S138</i>                        | <b>1.86</b>                         | 1.02        |
| <i>SGS@PGPLHSVSGYK</i>                        | <i>Rbm20_S728</i>                       | <b>-1.37</b>                        | -1.26       |
| <i>VDNARVS@PEVGSADVASIAQK</i>                 | <i>Fam21_S747</i>                       | <b>1.34</b>                         | -1.07       |
| <i>LLTRT@PDIAQR</i>                           | <i>Stk39_T366</i>                       | <b>-2.21</b>                        | -1.36       |
| <i>GDS@ETDLEALFNAVMPNK</i>                    | <i>Yap1_S46</i>                         | <b>1.79</b>                         | -1.06       |
| <i>TYS@LGSALRPSTSR</i>                        | <i>Vim_S39</i>                          | <b>3.40</b>                         | 1.35        |
| <i>GRS@SLDLDKTPAFLHVK</i>                     | <i>Neb1_S352</i>                        | <b>1.89</b>                         | 1.06        |
| <i>RES@DGTPGGGLASLENER</i>                    | <i>Sorbs1_S432(0:3)</i>                 | <b>1.96</b>                         | 1.19        |
| <i>LANISVPASES@PR</i>                         | <i>Tnks1bp1_S300</i>                    | <b>3.19</b>                         | <b>5.08</b> |
| <i>SRNS@PLDR</i>                              | <i>Mark2_S483</i>                       | <b>-1.79</b>                        | -1.33       |
| <i>IYHLPDAES@DEDEDKFEQTR</i>                  | <i>Sept2_S218</i>                       | <b>1.41</b>                         | 1.22        |
| <i>KLVIIES@DLERAER</i>                        | <i>Tpm1_S174</i>                        | <b>-9.99</b>                        | -           |

|                                  |                              |              |             |
|----------------------------------|------------------------------|--------------|-------------|
| SSHCD@PPRSQTPQDTNR               | <i>Bnip3_S60</i>             | <b>-2.33</b> | -1.34       |
| APS@WIDTGLSEMR                   | <i>Cryab_S59</i>             | <b>3.45</b>  | 1.64        |
| AIVSPFHS@PPSTPSSPGIR             | <i>Rcsd1_S120</i>            | <b>1.77</b>  | 1.07        |
| VAKPKS@PEPEATLTFPFLDK            | <i>Limch1_S719</i>           | <b>-1.37</b> | 1.11        |
| AAVGVGTNDITTPPNKEPPPS@PEKK       | <i>Map4_S667</i>             | <b>-1.50</b> | 1.01        |
| NKPRPPSLSLLGGHLPSTLSDGPSS@PR     | <i>Trip10_S351</i>           | <b>-1.89</b> | 1.18        |
| APHSPESPGHSDNPQSSPDSLEAS@PRNPGR  | <i>Perm1_S176</i>            | <b>-3.26</b> | 1.03        |
| VVANS@PANADYQER                  | <i>Ldb3_S112 (isoform 6)</i> | <b>-1.60</b> | -1.05       |
| HQCTSGPIVTLQGNDKSTS@PDPDWSSQLER  | <i>Synpo2_S220</i>           | <b>-1.72</b> | -1.08       |
| GCVAS@PVEGGR                     | <i>Synpo2_S300</i>           | <b>-1.45</b> | -1.07       |
| ILGSAS@PEEEQEKPILDRPTR           | <i>Szrd1_S107</i>            | <b>1.72</b>  | 1.11        |
| AS@GVTVNDEVIK                    | <i>Cfl2_S3</i>               | <b>-1.51</b> | 1.05        |
| RGS@LELGNPSAAHLGDELKEVSTAK       | <i>Svil_S960</i>             | <b>1.36</b>  | 1.39        |
| GLGCSDWKPEAGLS@PPR               | <i>Tcea3_S113</i>            | <b>-1.48</b> | 1.20        |
| SKPAAADS@EGEEEEEDTAKEKEPPQGGK    | <i>Abcf1_S194</i>            | <b>1.99</b>  | -1.14       |
| TTS@FAESCKPVQQPSAFGSMK           | <i>Gsk3b_S9</i>              | <b>4.32</b>  | 1.04        |
| MGQAGS@TISNSHAQPFDFPDDSQNAKK     | <i>Gja1_S325</i>             | <b>-3.24</b> | -2.23       |
| VKS@PETVKS@PK                    | <i>Ttn_S34464,S34470</i>     | <b>-1.55</b> | -1.01       |
| VQLLHSQNTS@LINQKK                | <i>Myh6_S1724</i>            | <b>1.27</b>  | 1.21        |
| KVS@KQEEASGGPLAPK                | <i>Vasp_S235</i>             | <b>1.92</b>  | 1.66        |
| GPVS@PPAR                        | <i>Naca_S257</i>             | <b>-1.37</b> | 1.14        |
| KRHS@GDFGADAQGAMSK               | <i>Mb_S121</i>               | <b>1.57</b>  | 1.38        |
| SSS@PVTELTAR                     | <i>Srrm2_S1068</i>           | <b>1.36</b>  | 1.07        |
| RS@SDPALTGLSTSVSDNNFSSEPSR       | <i>Pard3_S143</i>            | <b>1.29</b>  | 1.11        |
| VQLLHS@QNTSLINQK                 | <i>Myh6_S1720</i>            | <b>1.28</b>  | 1.51        |
| ATEEPS@GTGS@DELIKSDQVNGVVLVSLLDK | <i>Ptrf_S38,S42</i>          | <b>-3.39</b> | -3.53       |
| EQTAS@APATPLVSK                  | <i>Cobll1_S300</i>           | <b>-1.47</b> | 1.17        |
| LLQGLLS@DDEEQEDPKDYCK            | <i>Srpk3_S49</i>             | <b>-1.54</b> | -1.12       |
| SPS@TIDVVR                       | <i>Xirp1_S533</i>            | <b>3.82</b>  | <b>1.34</b> |

479

480 **Table 3. Top 50 age-related protein abundance changes in mouse hearts.** Bold indicates unadjusted P-

481 value<0.05. Ordered by lowest P-value in Young vs Old Control comparison. Full results can be found in

482 Appendix 3.

| Protein      | Fold Change Relative to Old Control |           |
|--------------|-------------------------------------|-----------|
|              | Young                               | Old SS-31 |
| <i>ApoE</i>  | <b>5.57</b>                         | -1.30     |
| <i>Cp</i>    | <b>7.12</b>                         | -1.20     |
| <i>Fetub</i> | <b>4.91</b>                         | -1.51     |
| <i>Hpx</i>   | <b>5.20</b>                         | -1.25     |
| <i>Tf</i>    | <b>1.89</b>                         | 1.04      |
| <i>Itih2</i> | <b>3.79</b>                         | -1.38     |
| <i>Ctsb</i>  | <b>2.04</b>                         | -1.08     |
| <i>Lcp1</i>  | <b>7.13</b>                         | -1.84     |

|                |              |              |
|----------------|--------------|--------------|
| <i>Sod2</i>    | <b>-1.44</b> | <b>1.25</b>  |
| <i>Ahsg</i>    | <b>1.63</b>  | 1.13         |
| <i>Cfl1</i>    | <b>1.82</b>  | -1.23        |
| <i>Ank3</i>    | <b>-6.30</b> | 1.43         |
| <i>Ppt1</i>    | <b>6.11</b>  | 1.25         |
| <i>Vtn</i>     | <b>7.26</b>  | -1.46        |
| <i>Mt1</i>     | <b>2.02</b>  | -1.30        |
| <i>Calu</i>    | <b>2.04</b>  | -1.17        |
| <i>S100a11</i> | <b>2.69</b>  | <b>-1.78</b> |
| <i>Hspg2</i>   | <b>1.38</b>  | <b>-1.25</b> |
| <i>Kng1</i>    | <b>2.46</b>  | -1.06        |
| <i>Asph</i>    | <b>-1.56</b> | 1.33         |
| <i>Kng1</i>    | <b>2.40</b>  | -1.02        |
| <i>Tgm2</i>    | <b>1.51</b>  | -1.05        |
| <i>Minos1</i>  | <b>-2.73</b> | -1.14        |
| <i>Tgfb1</i>   | <b>5.33</b>  | -1.21        |
| <i>Itih4</i>   | <b>15.51</b> | -1.19        |
| <i>Endog</i>   | <b>-1.63</b> | 1.06         |
| <i>Mt2</i>     | <b>3.44</b>  | -1.31        |
| <i>Dusp3</i>   | <b>1.39</b>  | -1.15        |
| <i>Anxa5</i>   | <b>1.56</b>  | 1.05         |
| <i>Wfs1</i>    | <b>6.33</b>  | <b>-1.33</b> |
| <i>Fabp4</i>   | <b>1.27</b>  | -1.20        |
| <i>Xdh</i>     | <b>2.20</b>  | -1.21        |
| <i>Itih1</i>   | <b>3.20</b>  | 1.05         |
| <i>Lama2</i>   | <b>-1.30</b> | 1.04         |
| <i>Cap1</i>    | <b>2.20</b>  | 1.10         |
| <i>Bgn</i>     | <b>2.73</b>  | -1.08        |
| <i>Impdh2</i>  | <b>2.49</b>  | -1.62        |
| <i>Cfh</i>     | <b>4.65</b>  | 1.06         |
| <i>Nt5c3</i>   | <b>1.47</b>  | <b>-2.14</b> |
| <i>Abat</i>    | <b>7.83</b>  | -1.30        |
| <i>Cltc</i>    | <b>1.47</b>  | -1.13        |
| <i>Art3</i>    | <b>-1.63</b> | 1.36         |
| <i>Rps2</i>    | <b>1.42</b>  | -1.09        |
| <i>Picalm</i>  | <b>3.58</b>  | -1.26        |
| <i>Acot7</i>   | <b>1.44</b>  | -1.62        |
| <i>Gc</i>      | <b>2.13</b>  | 1.08         |
| <i>Tppp</i>    | <b>-1.78</b> | <b>1.76</b>  |
| <i>Ctsd</i>    | <b>1.54</b>  | 1.17         |
| <i>Pex3</i>    | <b>1.50</b>  | 1.00         |
| <i>Bdh1</i>    | <b>1.63</b>  | <b>-1.22</b> |

483

484 **Table 4. Parallel Reaction Monitoring Mass Spectroscopy Peptide Results.**

|  |  | <b>Peptide Abundance</b> |
|--|--|--------------------------|
|--|--|--------------------------|

| Peptide (@ indicates site of phosphorylation) | Maps to Protein (site indicated when phosphorylated) | Young    | Old Control | Old SS-31 |
|-----------------------------------------------|------------------------------------------------------|----------|-------------|-----------|
| EQANLFSEWLR                                   | <i>Ttn</i>                                           | 1.30E-04 | 1.52E-04    | 1.42E-04  |
| EQANLFS@EWLR                                  | <i>Ttn_S4080</i>                                     | 1.08E-05 | 1.45E-05    | 1.59E-05  |
| VIQSYSIR                                      | <i>Actn2</i>                                         | 1.03E-03 | 1.12E-03    | 1.10E-03  |
| VIQSYS@IR                                     | <i>Actn2_S590</i>                                    | 2.53E-05 | 1.83E-05    | 1.81E-05  |
| RGTGGVDTAAVGAVFDISNADR                        | <i>Ckm</i>                                           | 8.55E-05 | 8.81E-05    | 8.63E-05  |
| RGT@GGVDTAAVGAVFDISNADR                       | <i>Ckm_T322</i>                                      | 1.45E-05 | 1.56E-05    | 1.76E-05  |
| RASAPLPGFSAPGR                                | <i>Hspb6</i>                                         | 9.43E-06 | 1.29E-05    | 1.34E-05  |
| RAS@APLPGFSAPGR                               | <i>Hspb6_S16</i>                                     | 6.95E-05 | 5.03E-05    | 6.25E-05  |
| RDSKLEAPAEEDVWEILR                            | <i>cMyBP-C</i>                                       | 1.56E-06 | 2.77E-06    | 2.61E-06  |
| RDS@KLEAPAEEDVWEILR                           | <i>cMyBP-C_S307</i>                                  | 2.99E-05 | 2.90E-05    | 2.54E-05  |
| SSSRAEANDQDAIQEK                              | <i>Myot</i>                                          | 2.87E-08 | 4.37E-07    | 5.80E-07  |
| SSS@RAEANDQDAIQEK                             | <i>Myot_S231</i>                                     | 3.54E-07 | 6.84E-07    | 6.72E-07  |
| RASTIEMPQQAR                                  | <i>Pln</i>                                           | 5.66E-06 | 6.85E-06    | 7.16E-06  |
| RAS@T@IEMPQQAR                                | <i>Pln_S15,T16</i>                                   | 2.23E-04 | 2.09E-04    | 2.32E-04  |

485

486

#### 487 FIGURE LEGENDS

488 **Figure 1. Analysis of Protein S-Glutathionylation in Mouse Hearts.** (A-B) Volcano plots of protein S-  
 489 glutathionylation analysis. Each dot represents one detected peptide. The horizontal dotted line indicates  
 490 FDR = 0.01. The vertical dotted lines represent log<sub>2</sub> ratios > 1 and < -1. (C) Histogram of %occupancy of  
 491 cysteine residues on detected peptides. (D) P-value heatmap of protein S-glutathionylation changes in  
 492 canonical pathways based on all changes with an unadjusted P<0.05. Top 25 pathways, ranked by P-value,  
 493 are shown. (E) Row-normalized z-score heatmaps of significant (P<0.05) S-glutathionylation differences in  
 494 selected pathways. (F) Mean GSH bound to protein by treatment group normalized to Control, as  
 495 determined by HPLC. N = 5 for all groups.

496

497 **Figure 2. Analysis of Phosphorylation Changes in Mouse Hearts.** (A-B) Volcano plots of protein global  
 498 phosphorylation analysis. Each dot represents one detected peptide. The horizontal dotted lines indicate  
 499 unadjusted P<0.01 and P<0.05 as noted on the chart. The vertical dotted lines represent log<sub>2</sub> ratios > 1  
 500 and < -1. (C) P-value heatmap of protein phosphorylation changes in canonical pathways based on all  
 501 changes with an unadjusted P<0.05. Top 25 pathways, ranked by P-value, are shown. (D) Row-normalized  
 502 z-score heatmaps of significant (P<0.05) S-phosphorylation differences in selected pathways.

503

504 **Figure 3. Analysis of Protein Abundance Changes in Mouse Hearts.** (A-B) Volcano plots of protein  
505 abundance analysis. Each dot represents one protein. The horizontal line indicates  $FDR < 0.01$ . (C) P-value  
506 heatmap of protein abundance changes in canonical pathways based on all changes with an unadjusted  
507  $P < 0.05$ . Top 25 pathways, ranked by P-value, are shown. (D) Row-normalized z-score heatmaps of  
508 significant ( $P < 0.05$ ) protein abundance differences in selected pathways.

509  
510 **Figure 4. Parallel Reaction Monitoring Mass Spectroscopy of Targeted Phosphorylation Sites in Mouse**  
511 **Hearts.** Sites targeted for analysis were (A-B) Ttn\_S4080, (C-D) Actn2\_S590, (E-F) cMyBP-C\_S307, (G-H)  
512 Myot\_S231, (I-J) Pln\_S15,T16, (K-L) Hspb6\_S16, (M-N) Ckm\_T322. Both the phosphorylated and  
513 unphosphorylated form of the associated peptide was analyzed for each. Peptide sequences are provided  
514 in Table 3. Young N = 5, Old Control N = 21, Old SS-31 N = 14.

515

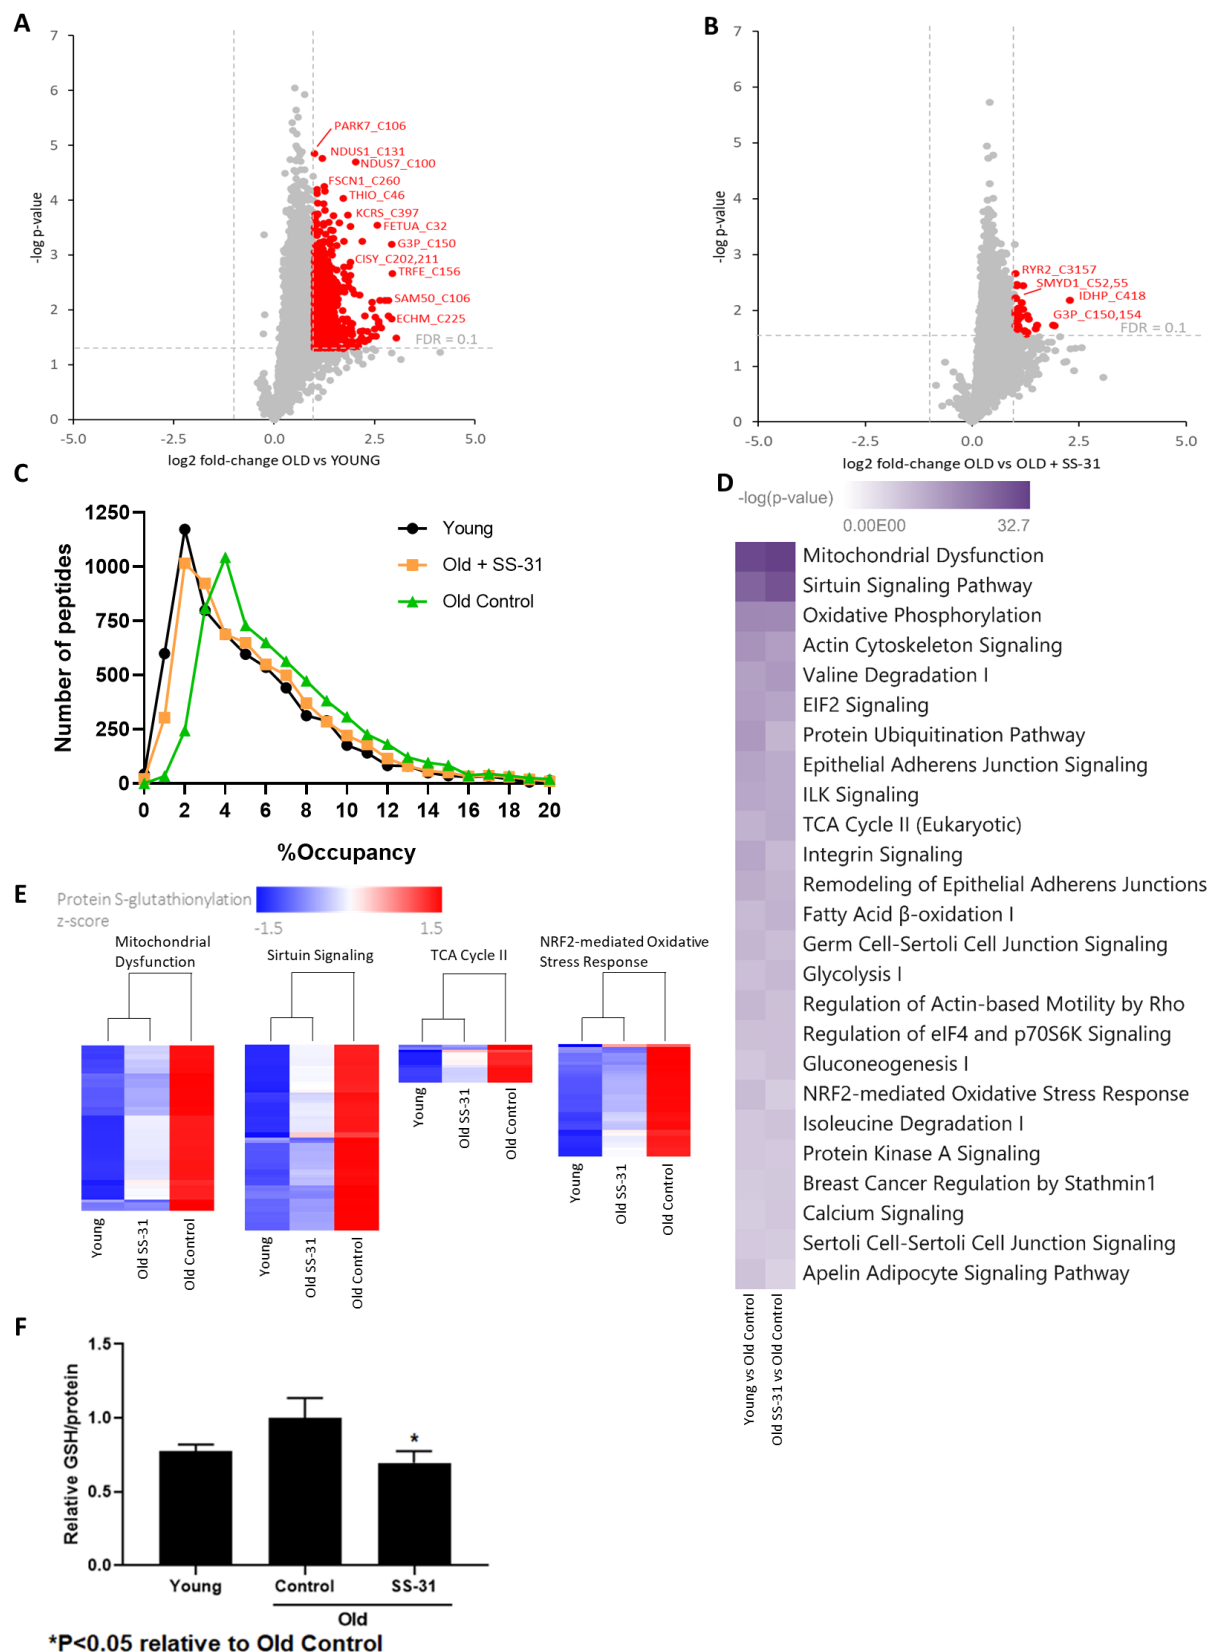

516

517 **Figure 1. Analysis of Protein S-Glutathionylation in Mouse Hearts.**

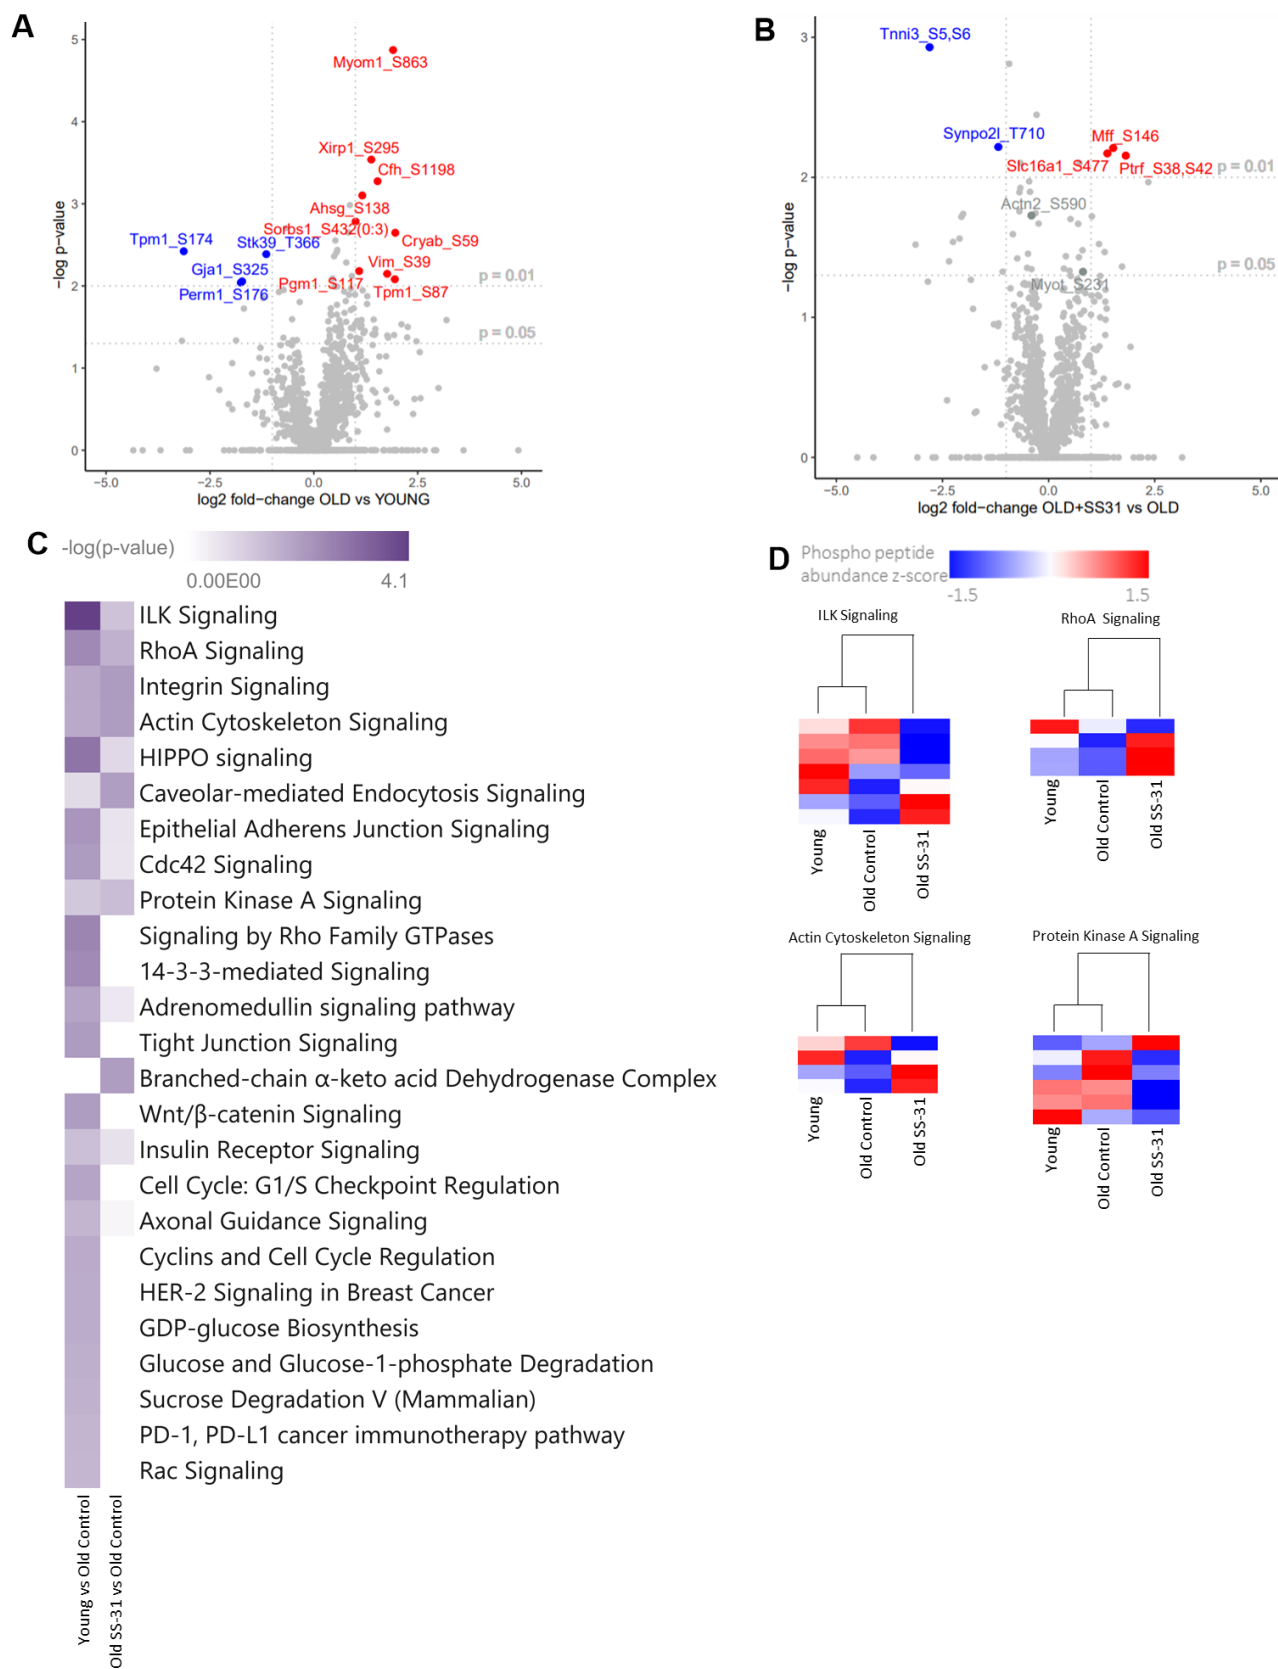

518

519 **Figure 2. Analysis of Phosphorylation Changes in Mouse Hearts**



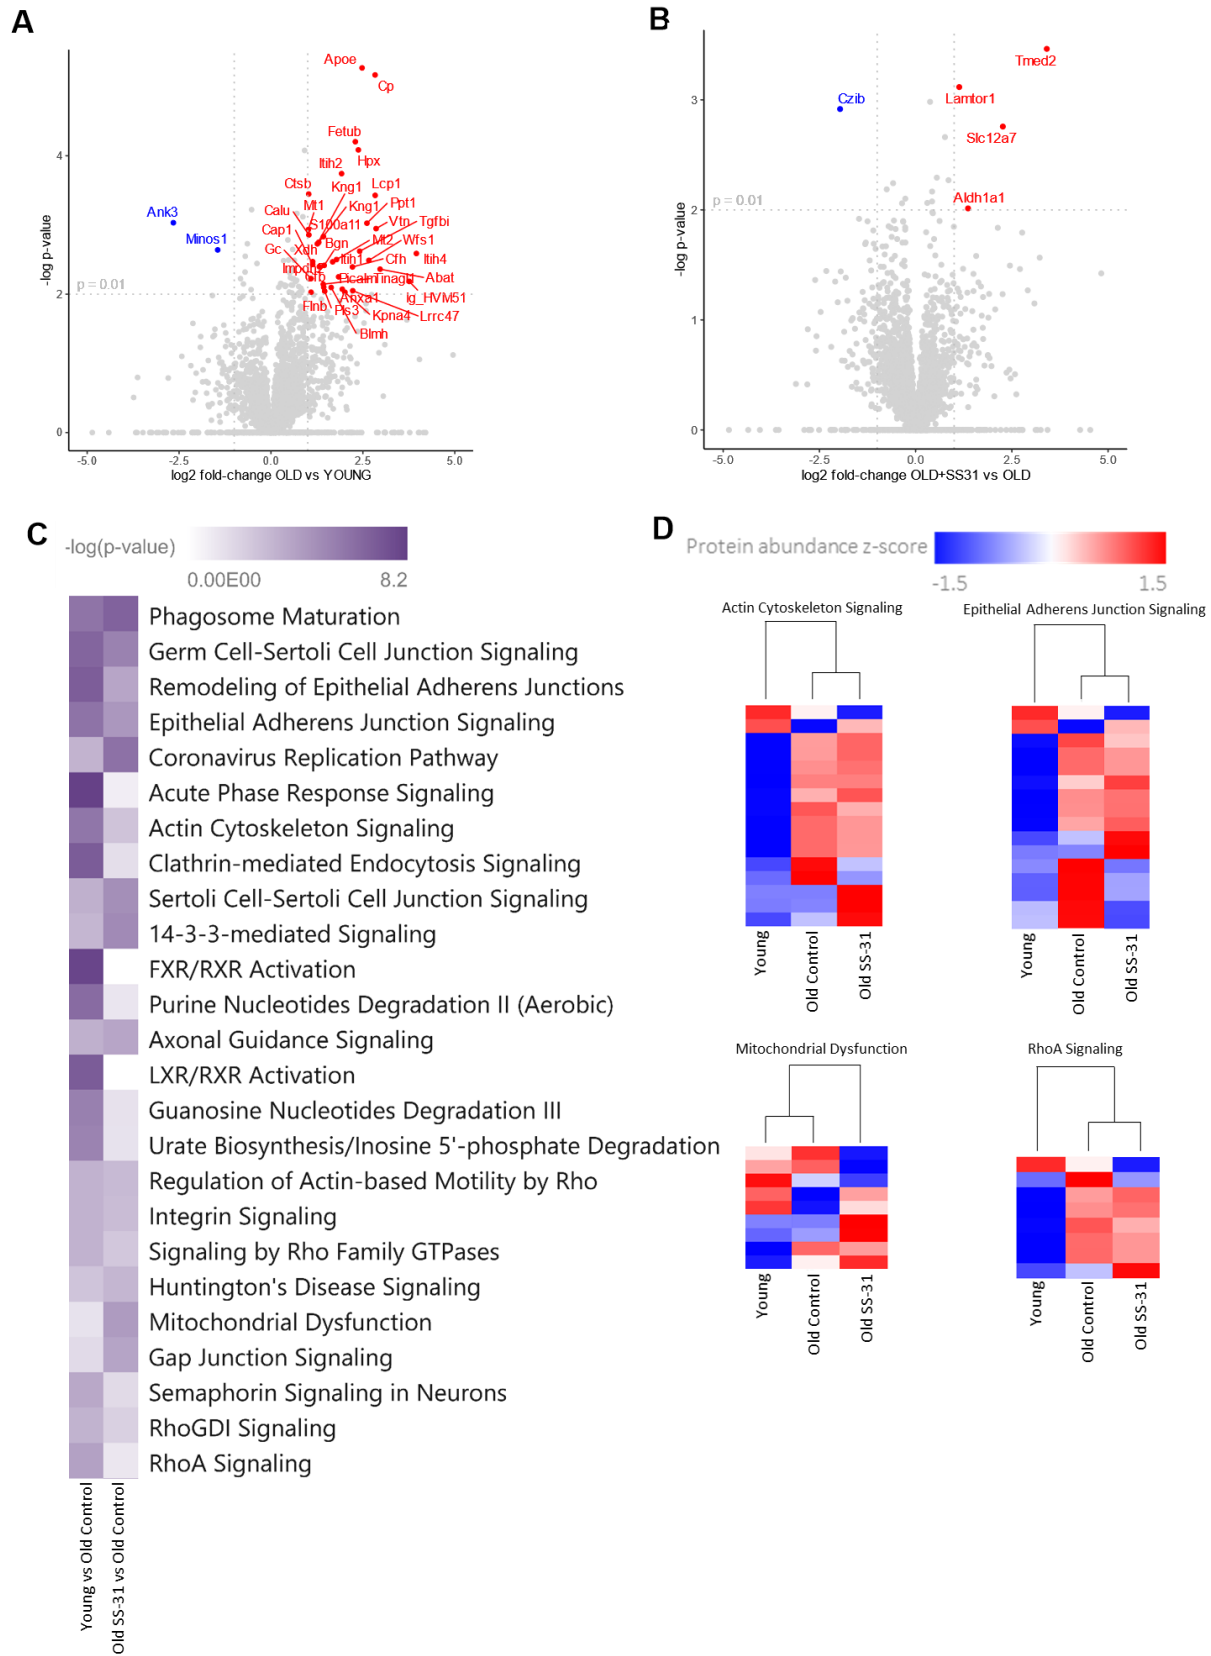

520

521 **Figure 3. Analysis of Protein Abundance Changes in Mouse Hearts.**

522

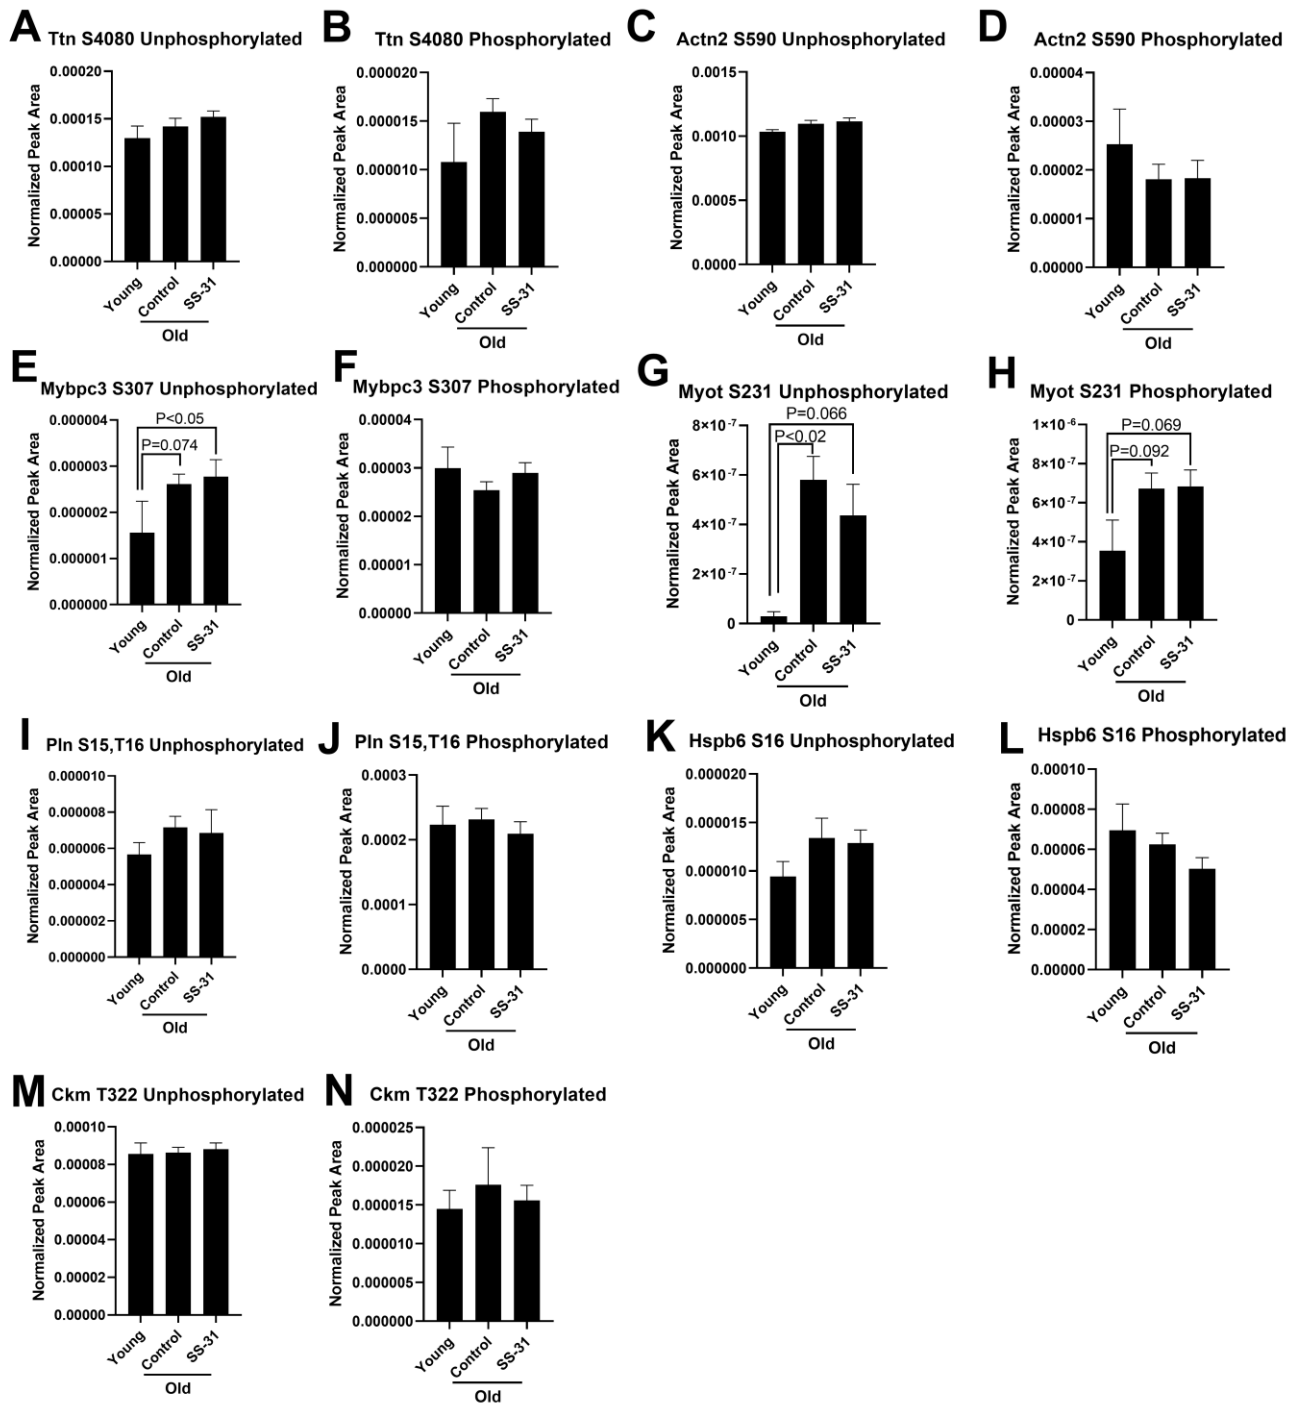

523

524 **Figure 4. Parallel Reaction Monitoring Mass Spectroscopy of Targeted Phosphorylation Sites in Mouse**

525 **Hearts.**
